# Supplementary material for: Enhancing climate change planning and adaptive management in marine protected areas through targets, thresholds, and social-ecological objectives
Source: Frontiers journal article supplement (doi:10.3389/fmars.2024.1339871), 2024-03-13
Supplement: Data_Sheet_1.PDF [file Data_Sheet_1.PDF]

Supplementary Table 1: Climate Robustness score, MPAs, country, and publication year of MPA monitoring plans assessed in the study.

| Monitoring Plan                                                  | Climate Robustness Score | Protected Area                                                                                                                                                                                                                                                                                                                                                                                                                                                                                                                                                                                                                                                                                                                                                                                                                                                                                                                                                                                                                                                                                                                                                                                                                                                                                                                                                                                                                                                                                                                  | Protected Area Designation | Country       | Publication Year |
|------------------------------------------------------------------|--------------------------|---------------------------------------------------------------------------------------------------------------------------------------------------------------------------------------------------------------------------------------------------------------------------------------------------------------------------------------------------------------------------------------------------------------------------------------------------------------------------------------------------------------------------------------------------------------------------------------------------------------------------------------------------------------------------------------------------------------------------------------------------------------------------------------------------------------------------------------------------------------------------------------------------------------------------------------------------------------------------------------------------------------------------------------------------------------------------------------------------------------------------------------------------------------------------------------------------------------------------------------------------------------------------------------------------------------------------------------------------------------------------------------------------------------------------------------------------------------------------------------------------------------------------------|----------------------------|---------------|------------------|
| Ahihi-Kina'u Natural Area Reserve Management Plan                | 6                        | Ahihi-Kina'u Natural Area Reserve                                                                                                                                                                                                                                                                                                                                                                                                                                                                                                                                                                                                                                                                                                                                                                                                                                                                                                                                                                                                                                                                                                                                                                                                                                                                                                                                                                                                                                                                                               | Natural Area Reserve       | United States | 2012             |
| Apalachicola National Estuarine Research Reserve Management Plan | 14                       | Apalachicola Bay Aquatic Preserve                                                                                                                                                                                                                                                                                                                                                                                                                                                                                                                                                                                                                                                                                                                                                                                                                                                                                                                                                                                                                                                                                                                                                                                                                                                                                                                                                                                                                                                                                               | Aquatic Preserve           | United States | 2014             |
| Arctic Network Vital Signs Monitoring Plan                       | 17                       | Bering Land Bridge National Preserve; Cape Krusenstern National Monument; Gates of the Arctic National Park and Preserve; Kobuk Valley National Park; Noatak National Preserve                                                                                                                                                                                                                                                                                                                                                                                                                                                                                                                                                                                                                                                                                                                                                                                                                                                                                                                                                                                                                                                                                                                                                                                                                                                                                                                                                  |                            | United States | 2009             |
| Australia Marine Parks Monitoring Program Design Plan            | 13                       | Coral Sea Reserves Marine Park; Moreton Bay Marine Park; Great Barrier Reef Marine Park; Joseph Bonaparte Gulf Marine Park; Oceanic Shoals Marine Park; Arafura Marine Park; Arnhem Marine Park; Wessel Marine Park; Limmen Marine Park; Gulf of Carpentaria Marine Park; West Cape York Marine Park; Shark Bay Marine Park; Carnarvon Canyon Marine Park; Ningaloo Marine Park; Gascoyne Marine Park; Montebello Marine Park; Dampier Marine Park; Eighty Mile Beach Marine Park; Roebuck Marine Park; Mermaid Reef Marine Park; Argo–Rowley Terrace Marine Park; Kimberley Marine Park; Ashmore Reef Marine Park; Cartier Island Marine Park; Christmas Island Marine Park; Cocos (Keeling) Islands Marine Park; Apollo Commonwealth Marine Reserve; Beagle Commonwealth Marine Reserve; Boags Commonwealth Marine Reserve; East Gippsland Commonwealth Marine Reserve; Flinders Commonwealth Marine Reserve; Franklin Commonwealth Marine Reserve; Freycinet Commonwealth Marine Reserve; South-east Commonwealth Marine Reserves Network; Huon Commonwealth Marine Reserve; Macquarie Island Commonwealth Marine Reserve; Murray Commonwealth Marine Reserve; Nelson Commonwealth Marine Reserve; South Tasman Rise Commonwealth Marine Reserve; Tasman Fracture Commonwealth Marine Reserve; Zeehan Commonwealth Marine Reserve; Southern Kangaroo Island Marine Park; Western Kangaroo Island Marine Park; Western Eyre Marine Park; Murat Marine Park; Great Australian Bight Marine Park; Twilight Marine Park; Eastern | Marine Park                | Australia     | 2021             |

|                                                                    |    |                                                                                                                                                                                                                                                                                                                                                                                                                                                                                                                                                                                                                                                                                                                                                                                                                                                                                                                                                                                                                                                                                                                                                                                                                                                                                                                                                                                                                                                                                                                                                                                                                                                                                                                                                                                                                                                                                                                                                                                                  |                                                                                                                                                      |               |      |
|--------------------------------------------------------------------|----|--------------------------------------------------------------------------------------------------------------------------------------------------------------------------------------------------------------------------------------------------------------------------------------------------------------------------------------------------------------------------------------------------------------------------------------------------------------------------------------------------------------------------------------------------------------------------------------------------------------------------------------------------------------------------------------------------------------------------------------------------------------------------------------------------------------------------------------------------------------------------------------------------------------------------------------------------------------------------------------------------------------------------------------------------------------------------------------------------------------------------------------------------------------------------------------------------------------------------------------------------------------------------------------------------------------------------------------------------------------------------------------------------------------------------------------------------------------------------------------------------------------------------------------------------------------------------------------------------------------------------------------------------------------------------------------------------------------------------------------------------------------------------------------------------------------------------------------------------------------------------------------------------------------------------------------------------------------------------------------------------|------------------------------------------------------------------------------------------------------------------------------------------------------|---------------|------|
|                                                                    |    | Recherche Marine Park; South-west Corner Marine Park; Bremer Marine Park; Geographe Marine Park; Perth Canyon Marine Park; Two Rocks Marine Park; Jurien Marine Park; Abrolhos Marine Park; Gifford Marine Park ; Norfolk Marine Park ; Lord Howe Marine Park; Central Eastern Marine Park; Solitary Islands Marine Park; Cod Grounds Marine Park; Hunter Marine Park; Jervis Marine Park                                                                                                                                                                                                                                                                                                                                                                                                                                                                                                                                                                                                                                                                                                                                                                                                                                                                                                                                                                                                                                                                                                                                                                                                                                                                                                                                                                                                                                                                                                                                                                                                        |                                                                                                                                                      |               |      |
| Basin Head Marine Protected Area: 2014 Operational Management Plan | 8  | Basin Head Marine Protected Area                                                                                                                                                                                                                                                                                                                                                                                                                                                                                                                                                                                                                                                                                                                                                                                                                                                                                                                                                                                                                                                                                                                                                                                                                                                                                                                                                                                                                                                                                                                                                                                                                                                                                                                                                                                                                                                                                                                                                                 | Marine Protected Area                                                                                                                                | Canada        | 2016 |
| California Marine Protected Area Monitoring Action Plan            | 17 | Pyramid Point State Marine Conservation Area; Point St. George Reef Offshore State Marine Conservation Area; Southwest Seal Rock Special Closure; Castle Rock Special Closure; False Klamath Rock Special Closure; Reading Rock State Marine Conservation Area; Reading Rock State Marine Reserve; Samoa State Marine Conservation Area; South Humboldt Bay State Marine Recreational Management Area; Sugarloaf Island Special Closure; South Cape Mendocino State Marine Reserve; Steamboat Rock Special Closure; Mattole Canyon State Marine Reserve; Sea Lion Gulch State Marine Reserve; Big Flat State Marine Conservation Area; Double Cone Rock State Marine Conservation Area; Rockport Rocks Special Closure; Vizcaino Rock Special Closure; Ten Mile State Marine Reserve; Ten Mile Beach State Marine Conservation Area; Ten Mile Estuary State Marine Conservation Area; MacKerricher State Marine Conservation Area; Point Cabrillo State Marine Reserve; Russian Gulch State Marine Conservation Area; Big River Estuary State Marine Conservation Area; Van Damme State Marine Conservation Area; Navarro River Estuary State Marine Conservation Area; Point Arena State Marine Reserve; Point Arena State Marine Conservation Area; Sea Lion Cove State Marine Conservation Area; Saunders Reef State Marine Conservation Area; Del Mar Landing State Marine Reserve; Stewarts Point State Marine Conservation Area; Stewarts Point State Marine Reserve; Salt Point State Marine Conservation Area; Gerstle Cove State Marine Reserve; Russian River State Marine Recreational Management Area; Russian River State Marine Conservation Area; Bodega Head State Marine Reserve; Estero Americano State Marine Recreational Management Area; Corte Madera Marsh State Marine Park; Marin Islands State Marine Park; Estero de San Antonio State Marine Recreational Management Area; Point Reyes State Marine Reserve; Point Reyes State Marine Conservation Area; Point Reyes | State Marine Reserve; State Marine Park; State Marine Conservation Area; Special Closure; State Marine Recreational Management Area; Special Closure | United States | 2018 |

|  |  |                                                                                                                                                                                                                                                                                                                                                                                                                                                                                                                                                                                                                                                                                                                                                                                                                                                                                                                                                                                                                                                                                                                                                                                                                                                                                                                                                                                                                                                                                                                                                                                                                                                                                                                                                                                                                                                                                                                                                                                                                                                                                                                                                                                                                                                                                                                                                                                                                                                                                                                                                                                                                                                                                             |  |  |  |
|--|--|---------------------------------------------------------------------------------------------------------------------------------------------------------------------------------------------------------------------------------------------------------------------------------------------------------------------------------------------------------------------------------------------------------------------------------------------------------------------------------------------------------------------------------------------------------------------------------------------------------------------------------------------------------------------------------------------------------------------------------------------------------------------------------------------------------------------------------------------------------------------------------------------------------------------------------------------------------------------------------------------------------------------------------------------------------------------------------------------------------------------------------------------------------------------------------------------------------------------------------------------------------------------------------------------------------------------------------------------------------------------------------------------------------------------------------------------------------------------------------------------------------------------------------------------------------------------------------------------------------------------------------------------------------------------------------------------------------------------------------------------------------------------------------------------------------------------------------------------------------------------------------------------------------------------------------------------------------------------------------------------------------------------------------------------------------------------------------------------------------------------------------------------------------------------------------------------------------------------------------------------------------------------------------------------------------------------------------------------------------------------------------------------------------------------------------------------------------------------------------------------------------------------------------------------------------------------------------------------------------------------------------------------------------------------------------------------|--|--|--|
|  |  | <p>Headlands Special Closure; Estero de Limantour State Marine Reserve; Drakes Estero State Marine Conservation Area; Point Resistance Rock Special Closure; Double Point/Stormy Stack Special Closure; Duxbury Reef State Marine Conservation Area; Fagan Marsh State Marine Park; Peytonia Slough State Marine Park; Albany Mudflats State Marine Park; Robert W. Crown State Marine Conservation Area; North Farallon Island State Marine Reserve; North Farallon Islands Special Closure; Southeast Farallon Island State Marine Reserve; Southeast Farallon Island State Marine Conservation Area; Southeast Farallon Island Special Closure; Egg (Devil's Slide) Rock to Devil's Slide Special Closure; Montara State Marine Reserve; Pillar Point State Marine Conservation Area; Egg (Devil's Slide) Rock to Devil's Slide Special Closure; Redwood Shores State Marine Park; Bair Island State Marine Park; Año Nuevo State Marine Conservation Area; Greyhound Rock State Marine Conservation Area; Natural Bridges State Marine Reserve; Elkhorn Slough State Marine Reserve; Elkhorn Slough State Marine Conservation Area; Moro Cojo Slough State Marine Reserve; Soquel Canyon State Marine Conservation Area; Portuguese Ledge State Marine Conservation Area; Edward F. Ricketts State Marine Conservation Area; Lovers Point State Marine Reserve; Pacific Grove Marine Gardens State Marine Conservation Area; Asilomar State Marine Reserve; Carmel Pinnacles State Marine Reserve; Carmel Bay State Marine Conservation Area; Point Lobos State Marine Reserve; Point Lobos State Marine Conservation Area; Point Sur State Marine Reserve; Point Sur State Marine Conservation Area; Big Creek State Marine Reserve; Big Creek State Marine Conservation Area; Piedras Blancas State Marine Reserve; Piedras Blancas State Marine Conservation Area; Cambria State Marine Conservation Area; White Rock (Cambria) State Marine Conservation Area; Morro Bay State Marine Reserve; Morro Bay State Marine Recreational Management Area; Point Buchon State Marine Reserve; Point Buchon State Marine Conservation Area; Vandenberg State Marine Reserve; Kashtayit State Marine Conservation Area; Naples State Marine Conservation Area; Campus Point State Marine Conservation Area; Goleta Slough State Marine Conservation Area; Santa Barbara Island State Marine Reserve (also Federal Marine Reserve); Scorpion State Marine Reserve (also Federal Marine Reserve); Gull Island State Marine Reserve (also Federal Marine Reserve); Painted Cave State Marine Conservation Area; South Point State Marine Reserve (also Federal Marine Reserve); Skunk Point</p> |  |  |  |
|--|--|---------------------------------------------------------------------------------------------------------------------------------------------------------------------------------------------------------------------------------------------------------------------------------------------------------------------------------------------------------------------------------------------------------------------------------------------------------------------------------------------------------------------------------------------------------------------------------------------------------------------------------------------------------------------------------------------------------------------------------------------------------------------------------------------------------------------------------------------------------------------------------------------------------------------------------------------------------------------------------------------------------------------------------------------------------------------------------------------------------------------------------------------------------------------------------------------------------------------------------------------------------------------------------------------------------------------------------------------------------------------------------------------------------------------------------------------------------------------------------------------------------------------------------------------------------------------------------------------------------------------------------------------------------------------------------------------------------------------------------------------------------------------------------------------------------------------------------------------------------------------------------------------------------------------------------------------------------------------------------------------------------------------------------------------------------------------------------------------------------------------------------------------------------------------------------------------------------------------------------------------------------------------------------------------------------------------------------------------------------------------------------------------------------------------------------------------------------------------------------------------------------------------------------------------------------------------------------------------------------------------------------------------------------------------------------------------|--|--|--|

|                                                                                                    |    |                                                                                                                                                                                                                                                                                                                                                                                                                                                                                                                                                                                                                                                                                                                                                                                                                                                                                                                                                                                                                                                                                                                                                                                                                                                                                                                                                                                                                                                                                                                                                                                                                                                                                                                                                                                                                                                                                                 |                       |          |      |
|----------------------------------------------------------------------------------------------------|----|-------------------------------------------------------------------------------------------------------------------------------------------------------------------------------------------------------------------------------------------------------------------------------------------------------------------------------------------------------------------------------------------------------------------------------------------------------------------------------------------------------------------------------------------------------------------------------------------------------------------------------------------------------------------------------------------------------------------------------------------------------------------------------------------------------------------------------------------------------------------------------------------------------------------------------------------------------------------------------------------------------------------------------------------------------------------------------------------------------------------------------------------------------------------------------------------------------------------------------------------------------------------------------------------------------------------------------------------------------------------------------------------------------------------------------------------------------------------------------------------------------------------------------------------------------------------------------------------------------------------------------------------------------------------------------------------------------------------------------------------------------------------------------------------------------------------------------------------------------------------------------------------------|-----------------------|----------|------|
|                                                                                                    |    | State Marine Reserve; Carrington Point State Marine Reserve; Judith Rock State Marine Reserve; San Miguel Island Special Closure; Harris Point State Marine Reserve (also Federal Marine Reserve); Begg Rock State Marine Reserve; Anacapa State Marine Reserve (also Federal Marine Reserve); Anacapa Island State Marine Conservation Area (also Federal Marine Conservation Area); Anacapa Island Special Closure; Cat Harbor State Marine Conservation Area; Farnsworth Onshore State Marine Conservation Area; Farnsworth Offshore State Marine Conservation Area; Lover's Cove State Marine Conservation Area; Casino Point State Marine Conservation Area; Long Point State Marine Reserve; Blue Cavern Onshore State Marine Conservation Area; Blue Cavern Offshore State Marine Conservation Area; Arrow Point to Lion Head Point State Marine Conservation Area; Point Dume State Marine Conservation Area; Point Dume State Marine Reserve; Point Vicente State Marine Conservation Area; Abalone Cove State Marine Conservation Area; Bolsa Bay State Marine Conservation Area; Bolsa Chica Basin State Marine Conservation Area; Upper Newport Bay State Marine Conservation Area; Crystal Cove State Marine Conservation Area; Laguna Beach State Marine Reserve; Laguna Beach State Marine Conservation Area; Dana Point State Marine Conservation Area; Batiquitos Lagoon State Marine Conservation Area; Swami's State Marine Conservation Area; San Elijo Lagoon State Marine Conservation Area; San Dieguito Lagoon State Marine Conservation Area; San Diego-Scripps Coastal State Marine Conservation Area; Matlahuayl State Marine Conservation Area; South La Jolla State Marine Reserve; South La Jolla State Marine Conservation Area; Famosa Slough State Marine Conservation Area; Cabrillo State Marine Reserve; Tijuana River Mouth State Marine Conservation Area |                       |          |      |
| Chumbe Island Coral Park Management Plan                                                           | 17 | Chumbe Island Coral Park                                                                                                                                                                                                                                                                                                                                                                                                                                                                                                                                                                                                                                                                                                                                                                                                                                                                                                                                                                                                                                                                                                                                                                                                                                                                                                                                                                                                                                                                                                                                                                                                                                                                                                                                                                                                                                                                        | Park                  | Tanzania | 2017 |
| Endeavour Hydrothermal Vents Marine Protected Area Monitoring Indicators, Protocols and Strategies | 6  | Endeavour Hydrothermal Vents Marine Protected Area                                                                                                                                                                                                                                                                                                                                                                                                                                                                                                                                                                                                                                                                                                                                                                                                                                                                                                                                                                                                                                                                                                                                                                                                                                                                                                                                                                                                                                                                                                                                                                                                                                                                                                                                                                                                                                              | Marine Protected Area | Canada   | 2011 |

|                                                                              |    |                                                                                                                                                                                                                                                                                                                                                                                                                                                                                                                                                                                                                                                      |                                                  |               |      |
|------------------------------------------------------------------------------|----|------------------------------------------------------------------------------------------------------------------------------------------------------------------------------------------------------------------------------------------------------------------------------------------------------------------------------------------------------------------------------------------------------------------------------------------------------------------------------------------------------------------------------------------------------------------------------------------------------------------------------------------------------|--------------------------------------------------|---------------|------|
| Glover's Reef Marine Reserve Management Plan                                 | 27 | Glover's Reef Marine Reserve and World Heritage Site                                                                                                                                                                                                                                                                                                                                                                                                                                                                                                                                                                                                 | Marine Reserve; Specially Protected Area         | Belize        | 2019 |
| Gough and Inaccessible Islands World Heritage Site Management Plan           | 15 | Gough Island Ramsar Site, Wetland of International Importance; Inaccessible Island Ramsar Site, Wetland of International Importance                                                                                                                                                                                                                                                                                                                                                                                                                                                                                                                  | Ramsar Site, Wetland of International Importance | Saint Helena  | 2015 |
| Great Barrier Reef Monitoring Package                                        | 22 | Great Barrier Reef Marine Park                                                                                                                                                                                                                                                                                                                                                                                                                                                                                                                                                                                                                       | Marine Park                                      | Australia     | 2015 |
| Gulf Coast Network Vital Signs Monitoring Plan                               | 18 | Gulf Islands National Seashore                                                                                                                                                                                                                                                                                                                                                                                                                                                                                                                                                                                                                       | National Seashore                                | United States | 2007 |
| Gulf of the Farallones National Marine Sanctuary Final Management Plan       | 14 | Gulf of the Farallones National Marine Sanctuary                                                                                                                                                                                                                                                                                                                                                                                                                                                                                                                                                                                                     | National Marine Sanctuary                        | United States | 2008 |
| Gully Marine Protected Area Monitoring Indicators, Protocols and Strategies  | 12 | Gully Marine Protected Area                                                                                                                                                                                                                                                                                                                                                                                                                                                                                                                                                                                                                          | Marine Protected Area                            | Canada        | 2010 |
| Monitoring framework for Sgaan Kinghlas Bowie Seamount Marine Protected Area | 21 | Sgaan Kinghlas Bowie Seamount Marine Protected Area                                                                                                                                                                                                                                                                                                                                                                                                                                                                                                                                                                                                  | Marine Protected Area                            | Canada        | 2022 |
| Musquash Estuary Marine Protected Area Ecosystem Monitoring Plan             | 7  | Musquash Estuary Marine Protected Area Ecosystem                                                                                                                                                                                                                                                                                                                                                                                                                                                                                                                                                                                                     | Marine Protected Area                            | Canada        | 2015 |
| National Estuarine Research Reserve System Monitoring Plan                   | 24 | Apalachicola National Estuarine Research Reserve; Ashepoo-Combahee-Edisto Basin National Estuarine Research Reserve; Chesapeake Bay National Estuarine Research Reserve (Maryland and Virginia); Delaware National Estuarine Research Reserve; Elkhorn Slough National Estuarine Research Reserve; Grand Bay National Estuarine Research Reserve; Great Bay National Estuarine Research Reserve; Guana Tolomato Matanzas National Estuarine Research Reserve; Hudson River National Estuarine Research Reserve; Jacques Cousteau National Estuarine Research Reserve; Mission-Aransas National Estuarine Research Reserve; Narragansett Bay National | National Estuarine Research Reserve              | United States | 2011 |

|                                                         |    |                                                                                                                                                                                                                                                                                                                                                                                                                                                                                                                                                                                                                                                                                                                                                                                                                                                                                                                                                                                                                                                                                                                                                                                                                                                              |                           |               |      |
|---------------------------------------------------------|----|--------------------------------------------------------------------------------------------------------------------------------------------------------------------------------------------------------------------------------------------------------------------------------------------------------------------------------------------------------------------------------------------------------------------------------------------------------------------------------------------------------------------------------------------------------------------------------------------------------------------------------------------------------------------------------------------------------------------------------------------------------------------------------------------------------------------------------------------------------------------------------------------------------------------------------------------------------------------------------------------------------------------------------------------------------------------------------------------------------------------------------------------------------------------------------------------------------------------------------------------------------------|---------------------------|---------------|------|
|                                                         |    | Estuarine Research Reserve; North Carolina National Estuarine Research Reserve; North Inlet-Winyah Bay National Estuarine Research Reserve; Old Woman Creek National Estuarine Research Reserve; Padilla Bay National Estuarine Research Reserve; Rookery Bay National Estuarine Research Reserve; San Francisco Bay National Estuarine Research Reserve; South Slough National Estuarine Research Reserve; Tijuana River National Estuarine Research Reserve; Waquoit Bay National Estuarine Research Reserve; Weeks Bay National Estuarine Research Reserve; Wells National Estuarine Research Reserve                                                                                                                                                                                                                                                                                                                                                                                                                                                                                                                                                                                                                                                     |                           |               |      |
| National Marine Sanctuary System Monitoring Framework   | 8  | Channel Islands National Marine Sanctuary; Cordell Bank National Marine Sanctuary; Greater Farallones National Marine Sanctuary; Monterey Bay National Marine Sanctuary; Olympic Coast National Marine Sanctuary; Florida Keys National Marine Sanctuary; Flower Garden Banks National Marine Sanctuary; Gray's Reef National Marine Sanctuary; Malloes Bay-Potomac River National Marine Sanctuary; Monitor National Marine Sanctuary; American Samoa National Marine Sanctuary; Hawaii Humpback Whale National Marine Sanctuary; Stellwagen Bank National Marine Sanctuary; Thunder Bay National Marine Sanctuary; Papahānaumokuākea National Marine Sanctuary                                                                                                                                                                                                                                                                                                                                                                                                                                                                                                                                                                                             | National Marine Sanctuary | United States | 2004 |
| National Wildlife Refuges Inventory and Monitoring Plan | 24 | Alligator River National Wildlife Refuge; Aransas National Wildlife Refuge; Back Bay National Wildlife Refuge; Baker Island National Wildlife Refuge; Bandon Marsh National Wildlife Refuge; Big Branch Marsh National Wildlife Refuge; Block Island National Wildlife Refuge; Bon Secour National Wildlife Refuge; Tijuana Slough National Wildlife Refuge; Cape May National Wildlife Refuge; Cape Romain National Wildlife Refuge; Cedar Island National Wildlife Refuge; Chassahowitzka National Wildlife Refuge; Martin National Wildlife Refuge; Susquehanna National Wildlife Refuge; Chincoteague National Wildlife Refuge; Wallops Island National Wildlife Refuge; Occoquan Bay National Wildlife Refuge; Caloosahatchee National Wildlife Refuge; Island Bay National Wildlife Refuge; Matlacha Pass National Wildlife Refuge; Pine Island National Wildlife Refuge; Crocodile Lake National Wildlife Refuge; Currituck National Wildlife Refuge; Breton National Wildlife Refuge; Delta National Wildlife Refuge; Don Edwards San Francisco Bay National Wildlife Refuge; Dungeness National Wildlife Refuge; Eastern Shore of Virginia National Wildlife Refuge; Fisherman Island National Wildlife Refuge; Edwin B. Forsythe National Wildlife | National Wildlife Refuge  | United States | 2010 |

|  |  |                                                                                                                                                                                                                                                                                                                                                                                                                                                                                                                                                                                                                                                                                                                                                                                                                                                                                                                                                                                                                                                                                                                                                                                                                                                                                                                                                                                                                                                                                                                                                                                                                                                                                                                                                                                                                                                                                                                                                                                                                                                                                                                                                                                                                                                                                                                                                                                                                                                                                                                                                                                                                                                                                            |  |  |  |
|--|--|--------------------------------------------------------------------------------------------------------------------------------------------------------------------------------------------------------------------------------------------------------------------------------------------------------------------------------------------------------------------------------------------------------------------------------------------------------------------------------------------------------------------------------------------------------------------------------------------------------------------------------------------------------------------------------------------------------------------------------------------------------------------------------------------------------------------------------------------------------------------------------------------------------------------------------------------------------------------------------------------------------------------------------------------------------------------------------------------------------------------------------------------------------------------------------------------------------------------------------------------------------------------------------------------------------------------------------------------------------------------------------------------------------------------------------------------------------------------------------------------------------------------------------------------------------------------------------------------------------------------------------------------------------------------------------------------------------------------------------------------------------------------------------------------------------------------------------------------------------------------------------------------------------------------------------------------------------------------------------------------------------------------------------------------------------------------------------------------------------------------------------------------------------------------------------------------------------------------------------------------------------------------------------------------------------------------------------------------------------------------------------------------------------------------------------------------------------------------------------------------------------------------------------------------------------------------------------------------------------------------------------------------------------------------------------------------|--|--|--|
|  |  | <p>Refuge; Elizabeth; Hartwell Mason Neck National Wildlife Refuge; Featherstone National Wildlife Refuge; Farallon National Wildlife Refuge; Grand Bay National Wildlife Refuge; Grays Harbor National Wildlife Refuge; Great Bay National Wildlife Refuge; Guam National Wildlife Refuge; Howland Island National Wildlife Refuge; J.N. "Ding" Darling National Wildlife Refuge; Jarvis Island National Wildlife Refuge; John H. Chafee National Wildlife Refuge; Laguna Atascosa National Wildlife Refuge; Lewis And Clark National Wildlife Refuge; Conscience Point National Wildlife Refuge; Oyster Bay National Wildlife Refuge; Seatuck National Wildlife Refuge; Target Rock National Wildlife Refuge; Wertheim National Wildlife Refuge; Great White Heron National Wildlife Refuge; Key West National Wildlife Refuge;; Lower Rio Grande Valley National Wildlife Refuge; Cedar Keys National Wildlife Refuge; Lower Suwannee National Wildlife Refuge; Mackay Island National Wildlife Refuge; Franklin Island National Wildlife Refuge; Petit Manan National Wildlife Refuge; Pond Island National Wildlife Refuge; Seal Island National Wildlife Refuge; Marin Islands National Wildlife Refuge; Merritt Island National Wildlife Refuge; Monomoy National Wildlife Refuge; Nestucca Bay National Wildlife Refuge; Ninigret National Wildlife Refuge; Nisqually National Wildlife Refuge; Nomans Land Island National Wildlife Refuge; Pea Island National Wildlife Refuge; Pearl Harbor National Wildlife Refuge; Pelican Island National Wildlife Refuge; Prime Hook National Wildlife Refuge; Protection Island National Wildlife Refuge; San Juan Islands National Wildlife Refuge; Rachel Carson National Wildlife Refuge; Rose Atoll National Wildlife Refuge; Sachuest Point National Wildlife Refuge; San Diego Bay National Wildlife Refuge; San Pablo Bay National Wildlife Refuge; Blackbeard Island National Wildlife Refuge; Harris Neck National Wildlife Refuge; Pinckney Island National Wildlife Refuge; Tybee National Wildlife Refuge; Wassaw National Wildlife Refuge; Seal Beach National Wildlife Refuge; Shell Keys National Wildlife Refuge; Siletz Bay National Wildlife Refuge; St. Marks National Wildlife Refuge; St. Vincent National Wildlife Refuge; Supawna Meadows National Wildlife Refuge;; Swanquarter National Wildlife Refuge; Egmont Key National Wildlife Refuge; Passage Key National Wildlife Refuge; Pinellas National Wildlife Refuge; Ten Thousand Islands National Wildlife Refuge; Anahuac National Wildlife Refuge; Big Boggy National Wildlife Refuge; Brazoria National Wildlife Refuge; San Bernard National Wildlife</p> |  |  |  |
|--|--|--------------------------------------------------------------------------------------------------------------------------------------------------------------------------------------------------------------------------------------------------------------------------------------------------------------------------------------------------------------------------------------------------------------------------------------------------------------------------------------------------------------------------------------------------------------------------------------------------------------------------------------------------------------------------------------------------------------------------------------------------------------------------------------------------------------------------------------------------------------------------------------------------------------------------------------------------------------------------------------------------------------------------------------------------------------------------------------------------------------------------------------------------------------------------------------------------------------------------------------------------------------------------------------------------------------------------------------------------------------------------------------------------------------------------------------------------------------------------------------------------------------------------------------------------------------------------------------------------------------------------------------------------------------------------------------------------------------------------------------------------------------------------------------------------------------------------------------------------------------------------------------------------------------------------------------------------------------------------------------------------------------------------------------------------------------------------------------------------------------------------------------------------------------------------------------------------------------------------------------------------------------------------------------------------------------------------------------------------------------------------------------------------------------------------------------------------------------------------------------------------------------------------------------------------------------------------------------------------------------------------------------------------------------------------------------------|--|--|--|

|                                                                |    |                                                                                                                                                                                                                                                                                                                                                                                                                                                                                                                                                                                                                                                  |                                                                                                                                                                                                                             |               |      |
|----------------------------------------------------------------|----|--------------------------------------------------------------------------------------------------------------------------------------------------------------------------------------------------------------------------------------------------------------------------------------------------------------------------------------------------------------------------------------------------------------------------------------------------------------------------------------------------------------------------------------------------------------------------------------------------------------------------------------------------|-----------------------------------------------------------------------------------------------------------------------------------------------------------------------------------------------------------------------------|---------------|------|
|                                                                |    | Refuge; Willapa National Wildlife Refuge; Wolf Island National Wildlife Refuge                                                                                                                                                                                                                                                                                                                                                                                                                                                                                                                                                                   |                                                                                                                                                                                                                             |               |      |
| North Coast and Cascades Network Vital Signs Monitoring Report | 24 | San Juan Island National Historical Park; Ebey's Landing National Historical Reserve; Olympic National Park; Minidoka National Historic Site; Lewis and Clark National Historical Park; Redwood National Park; Point Reyes National Seashore; Rosie the Riveter/World War II Home Front National Historical Park; Golden Gate National Recreation Area; Fort Point National Historic Site; San Francisco Maritime National Historical Park; Port Chicago Naval Magazine National Memorial; Santa Monica Mountains National Recreation Area; Channel Islands National Park; Cabrillo National Monument                                            | National Historic Park; National Historic Reserve; National Park; National Seashore; National Recreation Area; National Historic Site; National Memorial; National Monument                                                 | United States | 2005 |
| NPS North Atlantic Coastal Parks Monitoring Plan               | 25 | Saint Croix Island International Historic Site; Acadia National Park; Salem Maritime National Historic Site; Saugus Iron Works National Historic Site; Boston National Historical Park; Boston Harbor Islands National Recreation Area; Cape Cod National Seashore; New Bedford Whaling National Historical Park; Sagamore Hill National Historic Site; Fire Island National Seashore; Gateway National Recreation Area; Governors Island National Monument; Statue of Liberty National Monument; Fort McHenry National Monument and Historic Shrine; Harriet Tubman Underground Railroad National Monument; Assateague Island National Seashore | International Historic Site; National Historic Park; National Historic Reserve; National Park; National Seashore; National Recreation Area; National Historic Site; National Seashore; National Memorial; National Monument | United States | 2010 |
| Oregon Marine Reserves Ecological Monitoring Plan              | 12 | Cape Falcon Marine Reserve; Cascade Head Marine Reserve; Otter Rock Marine Reserve; Cape Perpetua Marine Reserve; Redfish Rocks Marine Reserve                                                                                                                                                                                                                                                                                                                                                                                                                                                                                                   | Marine Reserve                                                                                                                                                                                                              | United States | 2017 |
| Pacific Island Network Vital Signs Monitoring Plan             | 22 | World War II Valor in the Pacific National Monument; Kalaupapa National Historical Park; Haleakala National Park; Pu'ukohola Heiau National Historic Park; Kaloko-Honokohau National Historic Site; Pu'uhonua O Honaunau National Historical Park; Hawaii Volcanoes                                                                                                                                                                                                                                                                                                                                                                              | National Monument; National Historic Park; National                                                                                                                                                                         | United States | 2005 |



|                                                                                                 |    |                                                                                                                                                                                                                                                                                                                                                                                                                                                                                                                                                                                                                 |                                                                                          |                |      |
|-------------------------------------------------------------------------------------------------|----|-----------------------------------------------------------------------------------------------------------------------------------------------------------------------------------------------------------------------------------------------------------------------------------------------------------------------------------------------------------------------------------------------------------------------------------------------------------------------------------------------------------------------------------------------------------------------------------------------------------------|------------------------------------------------------------------------------------------|----------------|------|
|                                                                                                 |    | National Park; War in the Pacific National Historical Park; National Park of American Samoa                                                                                                                                                                                                                                                                                                                                                                                                                                                                                                                     | Park; National Historic Site                                                             |                |      |
| Papahānaumokuākea Marine National Monument Science Plan                                         | 20 | Papahānaumokuākea Marine National Monument                                                                                                                                                                                                                                                                                                                                                                                                                                                                                                                                                                      | Marine National Monument                                                                 | United States  | 2011 |
| Port Honduras Marine Reserve Management Plan                                                    | 27 | Port Honduras Marine Reserve                                                                                                                                                                                                                                                                                                                                                                                                                                                                                                                                                                                    | Marine Reserve                                                                           | Belize         | 2017 |
| Review of the Gilbert Bay Marine Protected Area Monitoring Indicators, Protocols and Strategies | 9  | Gilbert Bay Marine Protected Area                                                                                                                                                                                                                                                                                                                                                                                                                                                                                                                                                                               | Marine Protected Area                                                                    | Canada         | 2010 |
| Review of the Eastport Marine Protected Area Monitoring Indicators, Protocols and Strategies    | 9  | Eastport Marine Protected Area                                                                                                                                                                                                                                                                                                                                                                                                                                                                                                                                                                                  | Marine Protected Area                                                                    | Canada         | 2014 |
| Ross Sea MPA Monitoring Plan Package                                                            | 15 | Ross Sea Region Marine Protected Area                                                                                                                                                                                                                                                                                                                                                                                                                                                                                                                                                                           | Marine Protected Area                                                                    | Antarctica     | 2017 |
| San Francisco Bay Area Network Vital Signs Monitoring Plan                                      | 22 | San Francisco Maritime National Historical Park                                                                                                                                                                                                                                                                                                                                                                                                                                                                                                                                                                 | National Historic Park                                                                   | United States  | 2006 |
| San Juan County Marine Stewardship Area Monitoring Plan and Strategy                            | 24 | San Juan County Marine Stewardship Area                                                                                                                                                                                                                                                                                                                                                                                                                                                                                                                                                                         | Marine Stewardship Area                                                                  | United States  | 2011 |
| Scottish Marine Protected Areas Monitoring Strategy                                             | 8  | Central Fladen MPA; Clyde Sea Sill MPA; East Caithness Cliffs MPA; East of Gannet and Montrose Fields MPA; Faroe–Shetland Sponge Belt MPA; Fetlar to Haroldswick MPA; Firth of Forth Banks Complex MPA; Geikie Slide and Hebridean Slope MPA; Hatton-Rockall Basin MPA; Loch Carron MPA; Loch Creran MPA; Loch Sunart MPA; Loch Sunart to the Sound of Jura MPA; Loch Sween MPA; Lochs Duich, Long and Alsh MPA; Monach Isles MPA; Mousa to Boddam MPA; North-east Faroe–Shetland Channel MPA; North-east Lewis MPA; North-west Orkney MPA; Norwegian Boundary Sediment Plain MPA; Noss Head MPA; Red Rocks and | Marine Protected Area(MPA); Special Area of Concern (SAC); Special Protection Area (SPA) | United Kingdom | 2016 |

|  |                                                                                                                                                                                                                                                                                                                                                                                                                                                                                                                                                                                                                                                                                                                                                                                                                                                                                                                                                                                                                                                                                                                                                                                                                                                                                                                                                                                                                                                                                                                                                                                                                                                                                                                                                                                                                                                                                                                                                                                                                                                                                                                                                                                                                                                                                                                                                                                                                                                                                                                                                                                                                   |  |  |  |
|--|-------------------------------------------------------------------------------------------------------------------------------------------------------------------------------------------------------------------------------------------------------------------------------------------------------------------------------------------------------------------------------------------------------------------------------------------------------------------------------------------------------------------------------------------------------------------------------------------------------------------------------------------------------------------------------------------------------------------------------------------------------------------------------------------------------------------------------------------------------------------------------------------------------------------------------------------------------------------------------------------------------------------------------------------------------------------------------------------------------------------------------------------------------------------------------------------------------------------------------------------------------------------------------------------------------------------------------------------------------------------------------------------------------------------------------------------------------------------------------------------------------------------------------------------------------------------------------------------------------------------------------------------------------------------------------------------------------------------------------------------------------------------------------------------------------------------------------------------------------------------------------------------------------------------------------------------------------------------------------------------------------------------------------------------------------------------------------------------------------------------------------------------------------------------------------------------------------------------------------------------------------------------------------------------------------------------------------------------------------------------------------------------------------------------------------------------------------------------------------------------------------------------------------------------------------------------------------------------------------------------|--|--|--|
|  | <p>Longay MPA; Papa Westray MPA; Sea of the Hebrides MPA; Shiant East Bank MPA; Small Isles MPA; Southern Trench MPA; South Arran MPA; The Barra Fan and Hebrides Terrace Seamount MPA; Turbot Bank MPA; Upper Loch Fyne and Loch Goil MPA; West of Scotland MPA; West Shetland Shelf MPA; Wester Ross MPA; Wyre and Rousay Sounds MPA; Ailsa Craig SPA; Bluemull and Colgrave Sounds SPA; Buchan Ness to Collieston Coast SPA; Calf of Eday SPA; Canna and Sanday SPA; Cape Wrath SPA; Coll and Tiree SPA; Copinsay SPA; Cromarty Firth SPA; Dornoch Firth and Loch Fleet SPA; East Caithness Cliffs SPA; East Mainland Coast Shetland SPA; East Sanday Coast SPA; Fair Isle SPA; Fetlar SPA; Firth of Forth SPA; Firth of Tay and Eden Estuary SPA; Flannan Isles SPA; Forth Islands SPA; Foula SPA; Fowlsheugh SPA; Gruinart Flats, Islay SPA; Handa SPA; Hermaness, Saxa Vord and Valla Field SPA; Hoy SPA; Inner Clyde Estuary SPA; Inner Moray Firth SPA; Marwick Head SPA; Mingulay and Berneray SPA; Montrose Basin SPA; Moray and Nairn Coast SPA; Moray Firth SPA; North Caithness Cliffs SPA; North Colonsay and Western Cliffs SPA; North Orkney SPA; North Rona and Sula Sgeir SPA; North Uist Machair and Islands SPA; Noss SPA; Papa Stour SPA; Rousay SPA; Rum SPA; Scapa Flow SPA; Shiant Isles SPA; Sleibhtean agus Cladach Thiriodh (Tiree Wetlands and Coast) SPA; Sound of Gigha SPA; South Uist Machair and Lochs SPA; St Abb's Head to Fast Castle SPA; St Kilda SPA; Sule Skerry and Sule Stack SPA; Sumburgh Head SPA; Troup, Pennan and Lion's Heads SPA; West Coast of the Outer Hebrides SPA; West Westray SPA; Ythan Estuary, Sands of Forvie and Meikle Loch SPA; Outer Firth of Forth and St Andrews Bay Complex SPA; Seas off Foula SPA; Seas off St Kilda SPA; Rum SAC; Taynish and Knapdale Woods SAC; Yell Sound Coast SAC; Monach Islands SAC; North Rona SAC; Sound of Barra SAC/SCI; Mousa SAC; South Uist Machair SAC; Durness SAC; Luce Bay and Sands SAC; St Kilda SAC; Loch of Stenness SAC; The Vadills SAC; Papa Stour SAC; Loch nam Madadh SAC; Loch Roag Lagoons SAC; Lochs Duich, Long and Alsh Reefs SAC; Faray and Holm of Faray SAC; Obain Loch Euphoirt SAC; Hascosay SAC; Sound of Arisaig (Loch Ailort to Loch Ceann Traigh) SAC; Sunart SAC; Dornoch Firth and Morrich More SAC; Moray Firth SAC; Moine Mhor SAC; Firth of Lorn SAC; South-East Islay Skerries SAC; Sanday SAC; Glen Beasdale SAC; Inverpolly SAC; Isle of May SAC; Kinloch and Kyleakin Hills SAC; Eileanan agus Sgeiran Lios mor SAC; Loch Creran SAC; Loch Laxford SAC; Loch Moidart</p> |  |  |  |
|--|-------------------------------------------------------------------------------------------------------------------------------------------------------------------------------------------------------------------------------------------------------------------------------------------------------------------------------------------------------------------------------------------------------------------------------------------------------------------------------------------------------------------------------------------------------------------------------------------------------------------------------------------------------------------------------------------------------------------------------------------------------------------------------------------------------------------------------------------------------------------------------------------------------------------------------------------------------------------------------------------------------------------------------------------------------------------------------------------------------------------------------------------------------------------------------------------------------------------------------------------------------------------------------------------------------------------------------------------------------------------------------------------------------------------------------------------------------------------------------------------------------------------------------------------------------------------------------------------------------------------------------------------------------------------------------------------------------------------------------------------------------------------------------------------------------------------------------------------------------------------------------------------------------------------------------------------------------------------------------------------------------------------------------------------------------------------------------------------------------------------------------------------------------------------------------------------------------------------------------------------------------------------------------------------------------------------------------------------------------------------------------------------------------------------------------------------------------------------------------------------------------------------------------------------------------------------------------------------------------------------|--|--|--|

|                                                     |    |                                                                                                                                                                                                                                                                                                                                                                                                                                                                                                                                                                                                                                                                                                                                                                                                                                                                                      |                                                                                                                                                                                            |               |      |
|-----------------------------------------------------|----|--------------------------------------------------------------------------------------------------------------------------------------------------------------------------------------------------------------------------------------------------------------------------------------------------------------------------------------------------------------------------------------------------------------------------------------------------------------------------------------------------------------------------------------------------------------------------------------------------------------------------------------------------------------------------------------------------------------------------------------------------------------------------------------------------------------------------------------------------------------------------------------|--------------------------------------------------------------------------------------------------------------------------------------------------------------------------------------------|---------------|------|
|                                                     |    | and Loch Shiel Woods SAC; Mull Oakwoods SAC; Ascrib, Isay and Dunvegan SAC; Ardvar and Loch a' Mhuilinn Woodlands SAC; Sullom Voe SAC; Tayvallich Juniper and Coast SAC; Treshnish Isles SAC; Firth of Tay and Eden Estuary SAC; East Mingulay SAC; Inner Hebrides and the Minches SAC; Pobie Bank Reef SAC; Solan Bank Reef SAC; Darwin Mounds SAC; Scanner Pockmark SAC; Wyville Thomson Ridge SAC; Braemar Pockmarks SAC; Stanton Banks SAC; NorthWest Rockall Bank SAC; Anton Dohrn Seamount SAC; Hatton Bank cSAC; East Rockall Bank SAC;                                                                                                                                                                                                                                                                                                                                       |                                                                                                                                                                                            |               |      |
| Caribbean Network Vital Signs Monitoring Plan       | 19 | Salt River Bay National Historic Park and Ecological Preserve; San Juan National Historic Park; Virgin Islands National Park; Virgin Islands Coral Reef National Monument; Buck Island Reef National Monument; Christiansted National Historic Site                                                                                                                                                                                                                                                                                                                                                                                                                                                                                                                                                                                                                                  | National Park; National Historic Park and Ecological Preserve; National Monument; National Historic Site                                                                                   | United States | 2008 |
| Southeast Coast Network Vital Signs Monitoring Plan | 25 | Everglades National Park; Dry Tortugas National Park; Padre Island National Seashore; Big Thicket National Preserve; Jean Lafitte National Historical Park and Preserve; Gulf Islands National Seashore; De Soto National Memorial; Big Cypress National Preserve; George Washington Birthplace National Monument; Colonial National Historical Park; Fort Monroe National Monument; Fort Raleigh National Historic Site; Cape Hatteras National Seashore; Cape Lookout National Seashore; Charles Pinckney National Historic Site; Fort Sumter National Monument; Fort Pulaski National Monument; Fort Frederica National Monument; Cumberland Island National Seashore; Timucuan Ecological and Historic Preserve; Fort Caroline National Memorial; Castillo de San Marcos National Monument; Fort Matanzas National Monument; Canaveral National Seashore; Biscayne National Park | National Park; National Seashore; National Preserve; National Historical Park and Preserve; National Memorial; National Monument; National Historic Site; Ecological and Historic Preserve | United States | 2008 |
| St. Croix East End Marine Park Management Plan      | 16 | St. Croix East End Marine Park                                                                                                                                                                                                                                                                                                                                                                                                                                                                                                                                                                                                                                                                                                                                                                                                                                                       | Marine Park                                                                                                                                                                                | United States | 2016 |

|                                                                                              |    |                                                                                                                                                                                                                                                                                                                                                                                                                                                                                                                                                                                                                                                                                                                                                                                                                                                                                                                                                                                                                                                                                                                                                                                                                                                                                                                                                                                                                                                                                                                                                                                                                                                                                        |                                                                                                                          |                |      |
|----------------------------------------------------------------------------------------------|----|----------------------------------------------------------------------------------------------------------------------------------------------------------------------------------------------------------------------------------------------------------------------------------------------------------------------------------------------------------------------------------------------------------------------------------------------------------------------------------------------------------------------------------------------------------------------------------------------------------------------------------------------------------------------------------------------------------------------------------------------------------------------------------------------------------------------------------------------------------------------------------------------------------------------------------------------------------------------------------------------------------------------------------------------------------------------------------------------------------------------------------------------------------------------------------------------------------------------------------------------------------------------------------------------------------------------------------------------------------------------------------------------------------------------------------------------------------------------------------------------------------------------------------------------------------------------------------------------------------------------------------------------------------------------------------------|--------------------------------------------------------------------------------------------------------------------------|----------------|------|
| St. Thomas East End Reserves Management Plan                                                 | 18 | St. Thomas East End Reserves                                                                                                                                                                                                                                                                                                                                                                                                                                                                                                                                                                                                                                                                                                                                                                                                                                                                                                                                                                                                                                                                                                                                                                                                                                                                                                                                                                                                                                                                                                                                                                                                                                                           | Reserve                                                                                                                  | United States  | 2011 |
| Stellwagen Bank National Marine Sanctuary Draft Management Plan and Environmental Assessment | 17 | Stellwagen Bank National Marine Sanctuary                                                                                                                                                                                                                                                                                                                                                                                                                                                                                                                                                                                                                                                                                                                                                                                                                                                                                                                                                                                                                                                                                                                                                                                                                                                                                                                                                                                                                                                                                                                                                                                                                                              | National Marine Sanctuary                                                                                                | United States  | 2010 |
| Tarium Niryutait Marine Protected Area Monitoring Plan Package                               | 17 | Tarium Niryutait Marine Protected Area                                                                                                                                                                                                                                                                                                                                                                                                                                                                                                                                                                                                                                                                                                                                                                                                                                                                                                                                                                                                                                                                                                                                                                                                                                                                                                                                                                                                                                                                                                                                                                                                                                                 | Marine Protected Area                                                                                                    | Canada         | 2013 |
| UK Marine Strategy                                                                           | 26 | Swallow Sand MCZ; North East of Farnes Deep MCZ; Fulmar MCZ; Farnes East MCZ; Coquet to St Mary's MCZ; Runswick Bay MCZ; Aln Estuary MCZ; Berwick to St Mary's MCZ; Eider MCZ; Medway Estuary MCZ; Thanet Coast MCZ; The Blackwater, Crouch, Roach and Colne Estuaries MCZ; Holderness Inshore MCZ; Cromer Shoal Chalk Beds MCZ; Swale Estuary MCZ; Markham's Triangle MCZ; Orford Inshore MCZ; Kentish Knock East MCZ; Holderness Offshore MCZ; Swanscombe MCZ; Folkestone Pomerania MCZ; Beachy Head West MCZ; Kingmere MCZ; Pagham Harbour MCZ; Poole Rocks MCZ; South Dorset MCZ; Chesil Beach and Stennis Ledges MCZ; Torbay MCZ; Dover to Deal MCZ; Dover to Folkestone MCZ; Offshore Brighton MCZ; Offshore Overfalls MCZ; Utopia MCZ; The Needles MCZ; Goodwin Sands MCZ; Foreland MCZ; Inner Bank MCZ; Beachy Head East MCZ; Selsey Bill and the Hounds MCZ; Bembridge MCZ; Yarmouth to Cowes MCZ; Studland Bay MCZ; South of Portland MCZ; Axe Estuary MCZ; Otter Estuary MCZ; Dart Estuary MCZ; Southbourne Rough MCZ; Albert Field MCZ; Purbeck Coast MCZ; West of Wight-Barfleur MCZ; East of Start Point MCZ; Skerries Bank and Surrounds MCZ; Tamar Estuary MCZ; Whitsand and Looe Bay MCZ; Upper Fowey and Pont Pill MCZ; The Manacles MCZ; Isles of Scilly Sites MCZ; The Canyons MCZ; South-West Deeps (West) MCZ; East of Haig Fras MCZ; Padstow Bay and Surrounds MCZ; Lundy MCZ; Western Channel MCZ; Mounts Bay MCZ; Land's End MCZ; North-West of Jones Bank MCZ; Greater Haig Fras MCZ; Newquay and the Gannel MCZ; Hartland Point to Tintagel MCZ; Bideford to Foreland Point MCZ; North West of Lundy MCZ; Morte Platform MCZ; Camel Estuary MCZ; Devon Avon | Marine Conservation Zone MCZ); Highly Protected Area (HPA); Special Area of Concern (SAC), Special Protection Area (SPA) | United Kingdom | 2019 |

|  |                                                                                                                                                                                                                                                                                                                                                                                                                                                                                                                                                                                                                                                                                                                                                                                                                                                                                                                                                                                                                                                                                                                                                                                                                                                                                                                                                                                                                                                                                                                                                                                                                                                                                                                                                                                                                                                                                                                                                                                                                                                                                                                                                                                                                                                                                                                                                                                                                                                                                                                                                    |  |  |  |
|--|----------------------------------------------------------------------------------------------------------------------------------------------------------------------------------------------------------------------------------------------------------------------------------------------------------------------------------------------------------------------------------------------------------------------------------------------------------------------------------------------------------------------------------------------------------------------------------------------------------------------------------------------------------------------------------------------------------------------------------------------------------------------------------------------------------------------------------------------------------------------------------------------------------------------------------------------------------------------------------------------------------------------------------------------------------------------------------------------------------------------------------------------------------------------------------------------------------------------------------------------------------------------------------------------------------------------------------------------------------------------------------------------------------------------------------------------------------------------------------------------------------------------------------------------------------------------------------------------------------------------------------------------------------------------------------------------------------------------------------------------------------------------------------------------------------------------------------------------------------------------------------------------------------------------------------------------------------------------------------------------------------------------------------------------------------------------------------------------------------------------------------------------------------------------------------------------------------------------------------------------------------------------------------------------------------------------------------------------------------------------------------------------------------------------------------------------------------------------------------------------------------------------------------------------------|--|--|--|
|  | <p>Estuary MCZ; South of the Isles of Scilly MCZ; Cape Bank MCZ; South-West Deeps (East) MCZ; North-East of Haig Fras MCZ; Erme Estuary MCZ; Helford Estuary MCZ; South-West Approaches to Bristol Channel MCZ; South of Celtic Deep MCZ; Fylde MCZ; Cumbria Coast MCZ; West of Walney MCZ; Allonby Bay MCZ; South Rigg MCZ; Solway Firth MCZ; Ribble Estuary MCZ; Wyre-Lune MCZ; Queenie Corner MCZ; West of Copeland MCZ; Dolphin Head HPA; Allonby HPA; Alde-Ore Estuary SPA; Benfleet and Southend Marshes SPA; Blackwater Estuary (Mid-Essex Coast Phase 4) SPA; Breydon Water SPA; Chesil Beach and The Fleet SPA; Chichester and Langstone Harbours SPA; Colne Estuary (Mid-Essex Coast Phase 2) SPA; Coquet Island SPA; Crouch and Roach Estuaries (Mid-Essex Coast Phase 3) SPA; Deben Estuary SPA; Dengie (Mid-Essex Coast Phase 1) SPA; Dungeness, Romney Marsh and Rye Bay SPA; Exe Estuary SPA; Falmouth Bay to St Austell Bay SPA; Farne Islands SPA; Flamborough and Filey Coast SPA; Foulness (Mid-Essex Coast Phase 5) SPA; Gibraltar Point SPA; Hamford Water SPA; Humber Estuary SPA; Isles of Scilly SPA; Lindisfarne SPA; Medway Estuary and Marshes SPA; Mersey Estuary SPA; Mersey Narrows and North Wirral Foreshore SPA; Minsmere-Walberswick SPA; Morecambe Bay and Duddon Estuary SPA; North Norfolk Coast SPA; Northumberland Marine SPA; Northumbria Coast SPA; Pagham Harbour SPA; Poole Harbour SPA; Portsmouth Harbour SPA; Ribble and Alt Estuaries SPA; Solent and Dorset Coast SPA; Solent and Southampton Water SPA; Stour and Orwell Estuaries SPA; Tamar Estuaries Complex SPA; Teesmouth and Cleveland Coast SPA; Thames Estuary and Marshes SPA; Thanet Coast and Sandwich Bay SPA; The Swale SPA; the Wash SPA; Greater Wash SPA; Outer Thames Estuary SPA; Liverpool Bay / Bae Lerpwl SPA; Solway Firth SPA; Severn Estuary SPA; The Dee Estuary SPA; Belfast Lough SPA; Belfast Lough Open Water SPA; Carlingford Lough SPA; Killough Bay SPA; Larne Lough SPA; Lough Foyle SPA; Outer Ards SPA; Rathlin Island SPA; Strangford Lough SPA; Anglesey Terns / Morwenoliaid Ynys Môn SPA; Bae Caerfyrddin/ Carmarthen Bay SPA; Burry Inlet SPA; Dyfi Estuary / Aber Dyfi SPA; Glannau Aberdaron ac Ynys Enlli/ Aberdaron Coast and Bardsey Island SPA; Grassholm SPA; Northern Cardigan Bay / Gogledd Bae Ceredigion SPA; Traeth Lafan/ Lavan Sands, Conway Bay SPA; Skomer, Skokholm and the Seas off Pembrokeshire / Sgomer, Sgogwm a Moroedd Penfro SPA; Irish Sea Front SPA; Braunton Burrows SAC;</p> |  |  |  |
|--|----------------------------------------------------------------------------------------------------------------------------------------------------------------------------------------------------------------------------------------------------------------------------------------------------------------------------------------------------------------------------------------------------------------------------------------------------------------------------------------------------------------------------------------------------------------------------------------------------------------------------------------------------------------------------------------------------------------------------------------------------------------------------------------------------------------------------------------------------------------------------------------------------------------------------------------------------------------------------------------------------------------------------------------------------------------------------------------------------------------------------------------------------------------------------------------------------------------------------------------------------------------------------------------------------------------------------------------------------------------------------------------------------------------------------------------------------------------------------------------------------------------------------------------------------------------------------------------------------------------------------------------------------------------------------------------------------------------------------------------------------------------------------------------------------------------------------------------------------------------------------------------------------------------------------------------------------------------------------------------------------------------------------------------------------------------------------------------------------------------------------------------------------------------------------------------------------------------------------------------------------------------------------------------------------------------------------------------------------------------------------------------------------------------------------------------------------------------------------------------------------------------------------------------------------|--|--|--|

|                                                             |    |                                                                                                                                                                                                                                                                                                                                                                                                                                                                                                                                                                                                                                                                                                                                                                                                                                                                                                                                                                                                                                                                                                                                                                                                                                                                                                                                                                                                                                                                                                                                                                                                                                                                                                                                                                                                                                                                                             |                                       |                                |      |
|-------------------------------------------------------------|----|---------------------------------------------------------------------------------------------------------------------------------------------------------------------------------------------------------------------------------------------------------------------------------------------------------------------------------------------------------------------------------------------------------------------------------------------------------------------------------------------------------------------------------------------------------------------------------------------------------------------------------------------------------------------------------------------------------------------------------------------------------------------------------------------------------------------------------------------------------------------------------------------------------------------------------------------------------------------------------------------------------------------------------------------------------------------------------------------------------------------------------------------------------------------------------------------------------------------------------------------------------------------------------------------------------------------------------------------------------------------------------------------------------------------------------------------------------------------------------------------------------------------------------------------------------------------------------------------------------------------------------------------------------------------------------------------------------------------------------------------------------------------------------------------------------------------------------------------------------------------------------------------|---------------------------------------|--------------------------------|------|
|                                                             |    | <p>Morecambe Bay SAC; Drigg Coast SAC; Flamborough Head SAC; Thanet Coast SAC; Plymouth Sound and Estuaries SAC; Fal and Helford SAC; Lundy SAC; Essex Estuaries SAC; Isles of Scilly Complex SAC; Orfordness - Shingle Street SAC; Solent and Isle of Wight Lagoons SAC; The Wash and North Norfolk Coast SAC; Chesil and the Fleet SAC; North Norfolk Coast SAC; Solent Maritime SAC; South Wight Maritime SAC; Alde, Ore and Butley Estuaries SAC; Humber Estuary SAC; Tweed Estuary SAC; Margate and Long Sands SAC; Lyme Bay and Torbay SAC; Start Point to Plymouth Sound &amp; Eddystone SAC; Lizard Point SAC; Lands End and Cape Bank SAC; Shell Flat and Lune Deep SAC; Studland to Portland SAC; Haisborough, Hammond and Winterton SAC; Inner Dowsing, Race Bank and North Ridge SAC; Southern North Sea SAC; Bristol Channel Approaches / Dynesfeydd Môr Hafren SAC; Solway Firth SAC; Berwickshire and North Northumberland Coast SAC; Severn Estuary/ Môr Hafren SAC; Dee Estuary/ Aber Dyfrdwy SAC; Dogger Bank SAC; Haig Fras SAC; North Norfolk Sandbanks and Saturn Reef SAC; Bassurelle Sandbank SAC; Wight-Barfleur Reef SAC; Murlough SAC; Strangford Lough SAC; Rathlin Island SAC; Red Bay SAC; Skerries and Causeway SAC; Te Maidens SAC; North Channel SAC; Pisces Reef Complex SAC; North Anglesey Marine / Gogledd Môn Forol SAC; Kenfig/ Cynffig SAC; Cardigan Bay/Bae Ceredigion SAC; Pembrokeshire Marine/Sir Benfro Forol SAC; Pen Llyn a'r Sarnau/ Llyn Peninsula and the Sarnau SAC; Limestone Coast of South West Wales/ Arfordir Calchfaen de Orllewin Cymru SAC; Carmarthen Bay and Estuaries/ Bae Caerfyrddin ac Aberoedd SAC; Glannau Môn: Cors heli /Anglesey Coast: Saltmarsh SAC; Bae Cemlyn/ Cemlyn Bay SAC; Y Fenai a Bae Conwy/ Menai Strait and Conwy Bay SAC; West Wales Marine / Gorllewin Cymru Forol SAC; Croker Carbonate Slabs SAC;</p> |                                       |                                |      |
| Thunder Bay National Marine Sanctuary Final Management Plan | 11 | Thunder Bay National Marine Sanctuary                                                                                                                                                                                                                                                                                                                                                                                                                                                                                                                                                                                                                                                                                                                                                                                                                                                                                                                                                                                                                                                                                                                                                                                                                                                                                                                                                                                                                                                                                                                                                                                                                                                                                                                                                                                                                                                       | National Marine Sanctuary             | United States                  | 2009 |
| Tobago Cays Marine Park Management Plan                     | 7  | Tobago Cays Marine Park                                                                                                                                                                                                                                                                                                                                                                                                                                                                                                                                                                                                                                                                                                                                                                                                                                                                                                                                                                                                                                                                                                                                                                                                                                                                                                                                                                                                                                                                                                                                                                                                                                                                                                                                                                                                                                                                     | Marine Park; Specially Protected Area | St. Vincent and the Grenadines | 2007 |
| Vital signs monitoring plan: Southeast Alaska Network       | 21 | Aniakchak National Monument and Preserve; Bering Land Bridge National Preserve; Cape Krusenstern National Monument; Glacier Bay National Park and Preserve; Katmai National Park and Preserve;                                                                                                                                                                                                                                                                                                                                                                                                                                                                                                                                                                                                                                                                                                                                                                                                                                                                                                                                                                                                                                                                                                                                                                                                                                                                                                                                                                                                                                                                                                                                                                                                                                                                                              | National Park and Preserve            | United States                  | 2008 |

|  |  |                                                                                                                                                                                               |  |  |  |
|--|--|-----------------------------------------------------------------------------------------------------------------------------------------------------------------------------------------------|--|--|--|
|  |  | Kenai Fjords National Park; Klondike Gold Rush National Historical Park; Lake Clark National Park and Preserve; Sitka National Historical Park; Wrangell-St. Elias National Park and Preserve |  |  |  |
|--|--|-----------------------------------------------------------------------------------------------------------------------------------------------------------------------------------------------|--|--|--|
